# Supplementary material for: Promoter Nucleosome Organization Shapes the Evolution of Gene Expression
Source: PubMed Central journal article supplement (PMC3305400; doi:10.1371/journal.pgen.1002579), 2012-03-15
Supplement: pgen.1002579.s003.pdf [file pgen.1002579.s003.pdf]

Fig. S3

### Dominant strains

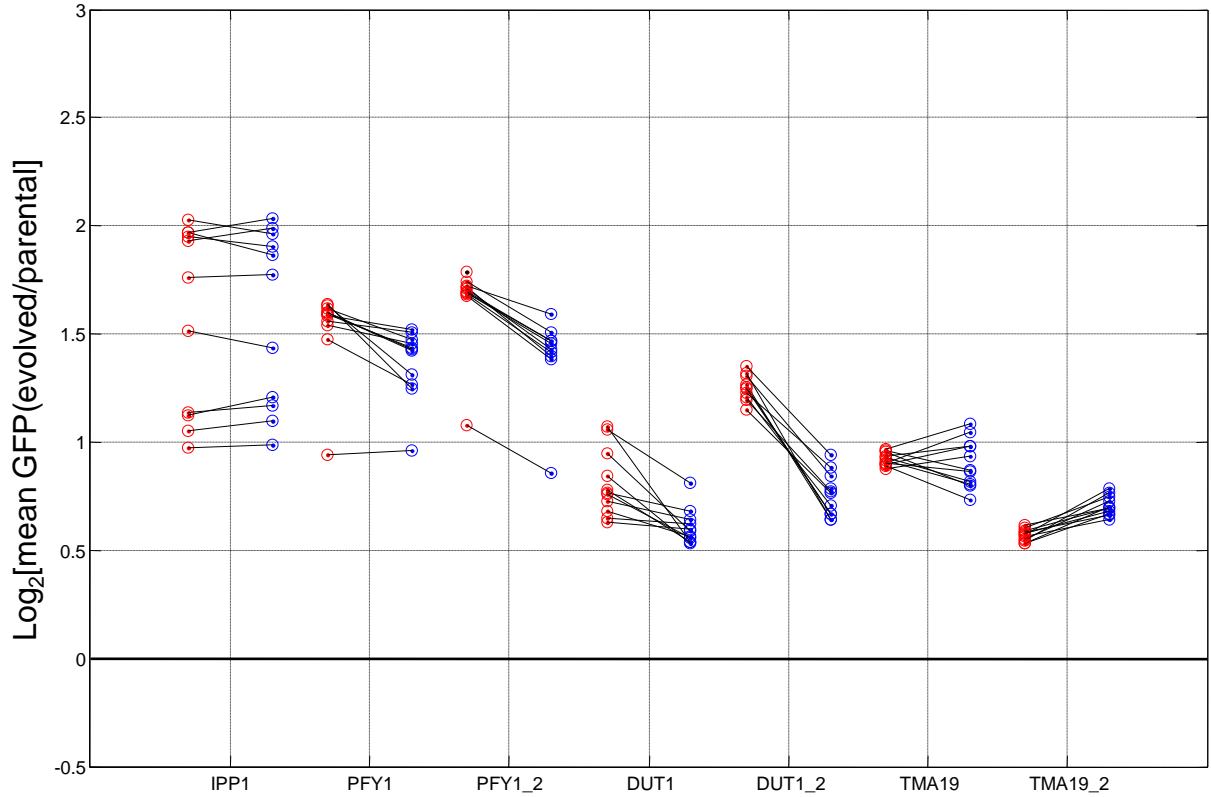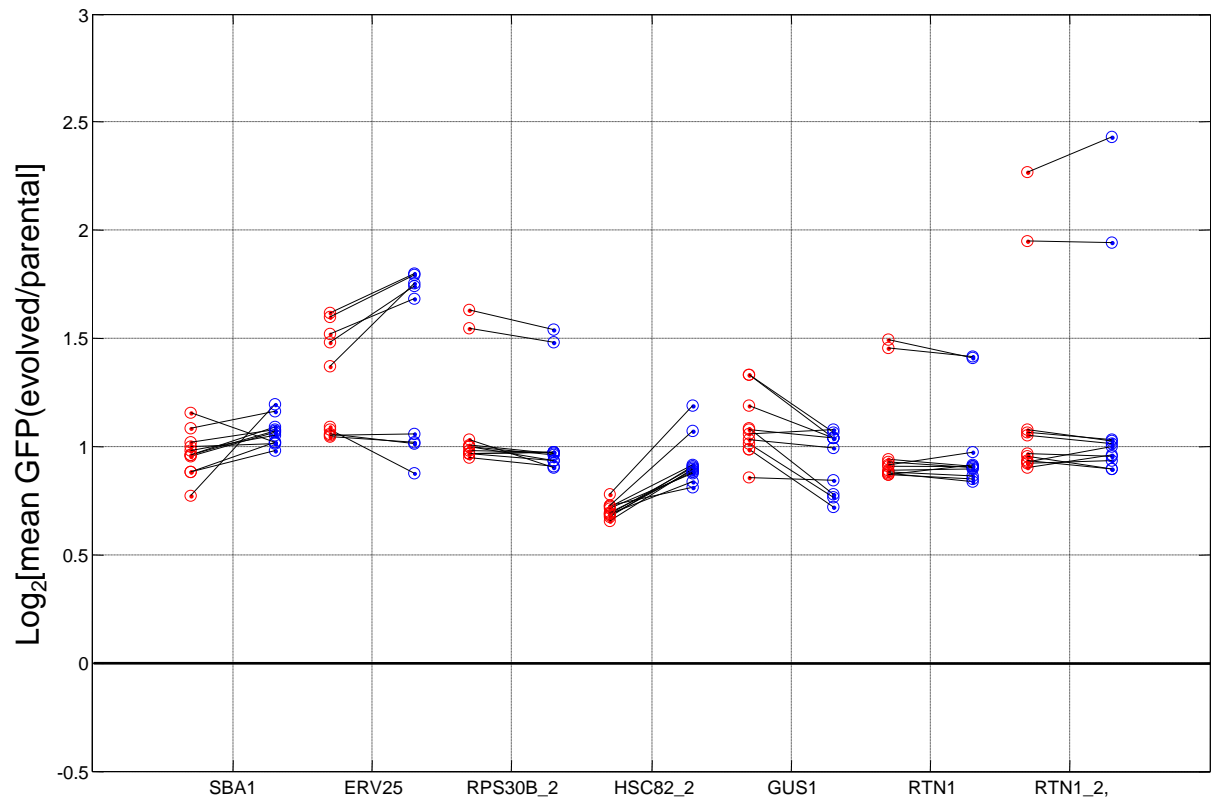

○ Haploids      ○ Diploids

Fig. S3

### Dominant strains

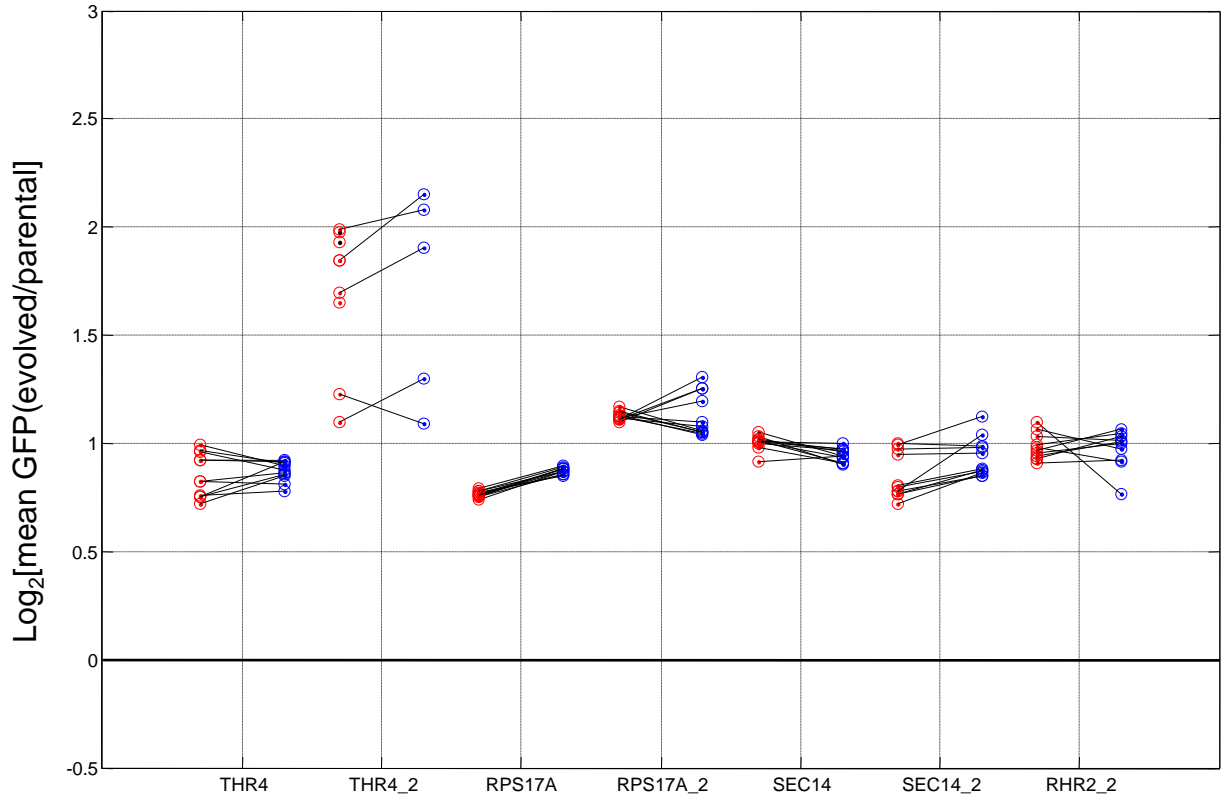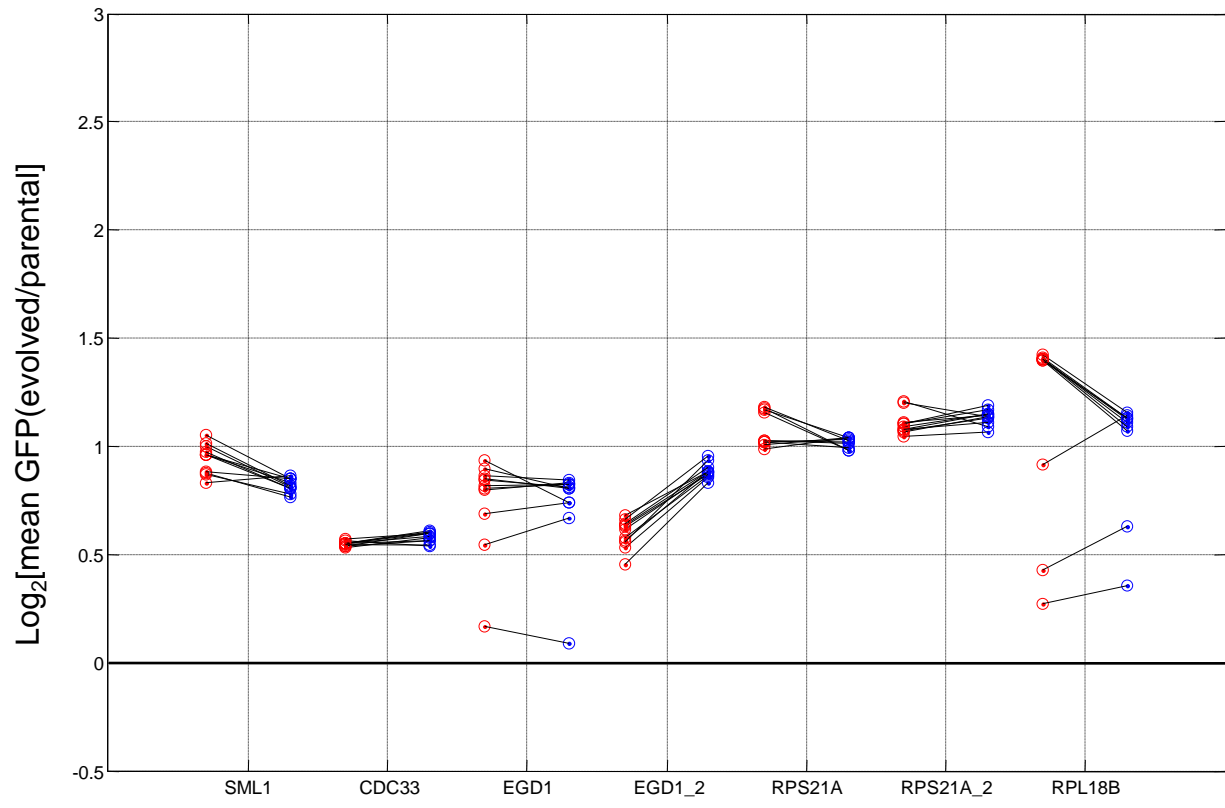

○ Haploids      ○ Diploids

Fig. S3

### Recessive strains

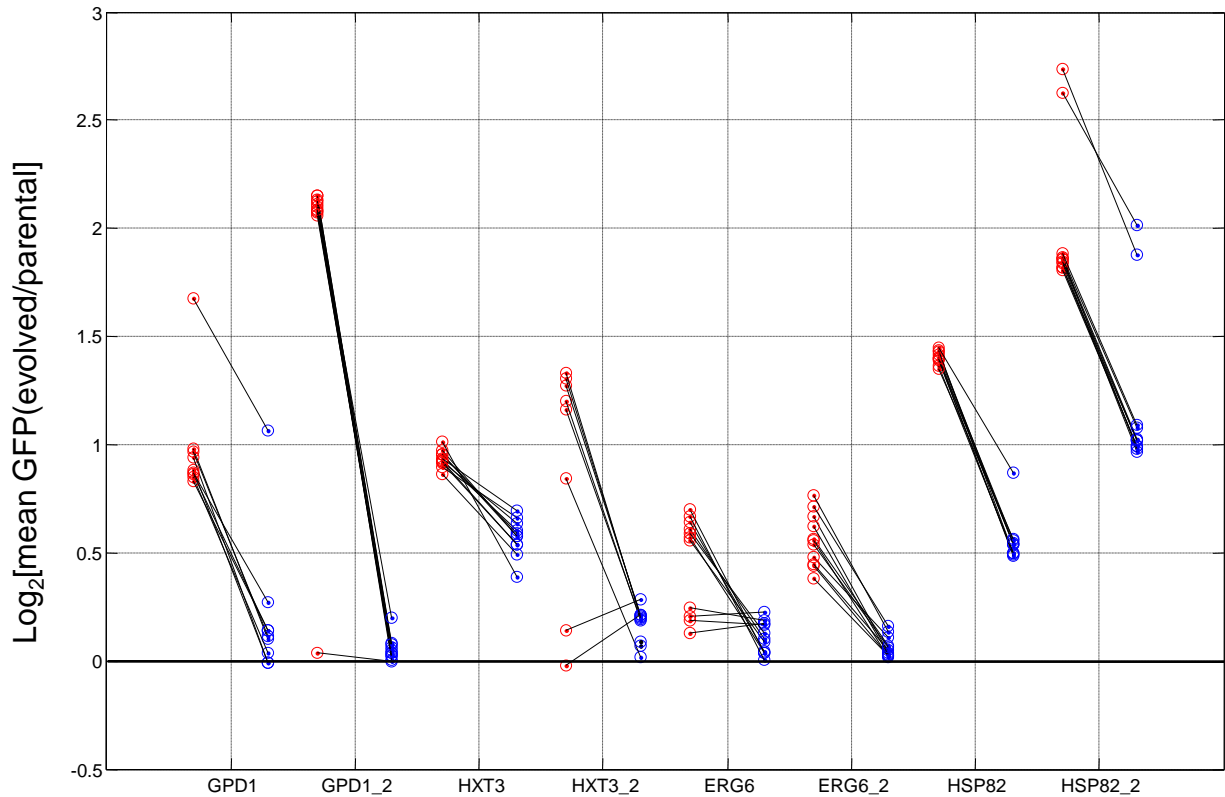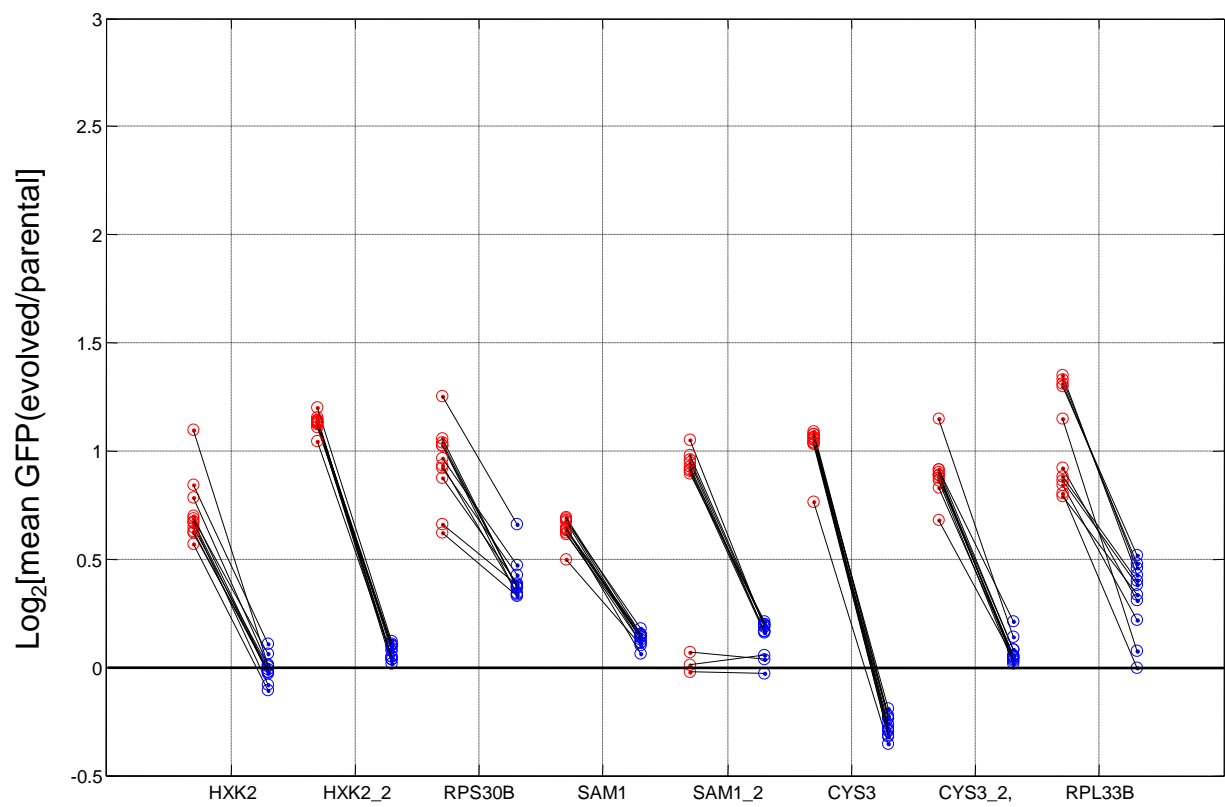

○ Haploids      ○ Diploids

Fig. S3

### Recessive strains

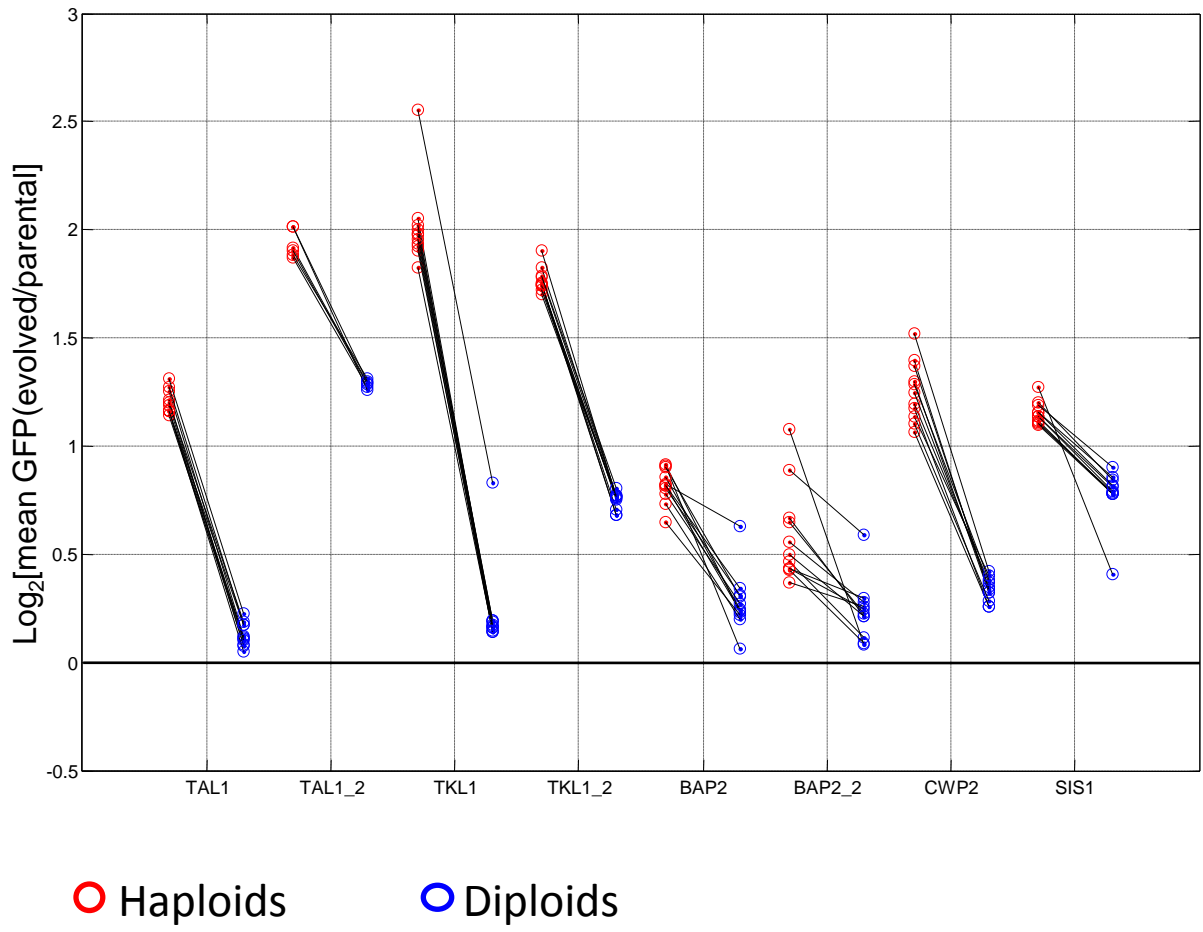

Fig. S3

### Strains with more than one mode of evolution.

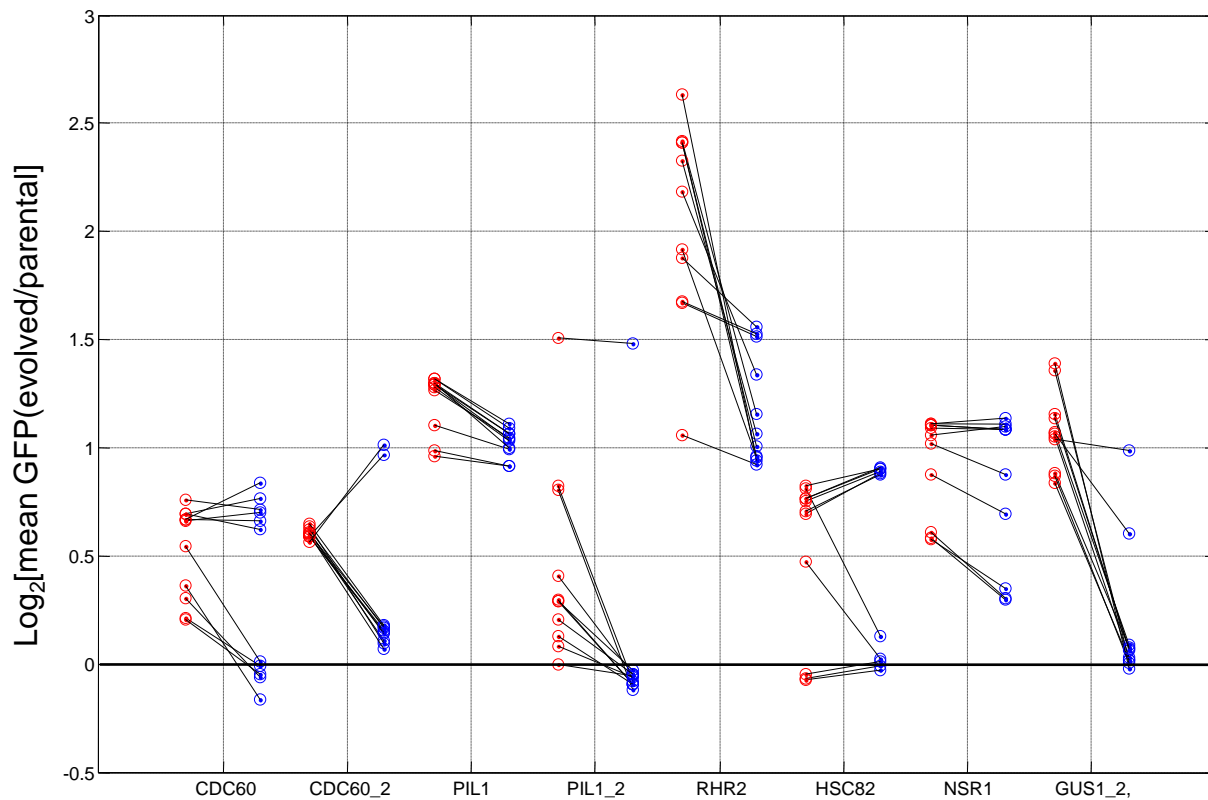

### Unevolved strains

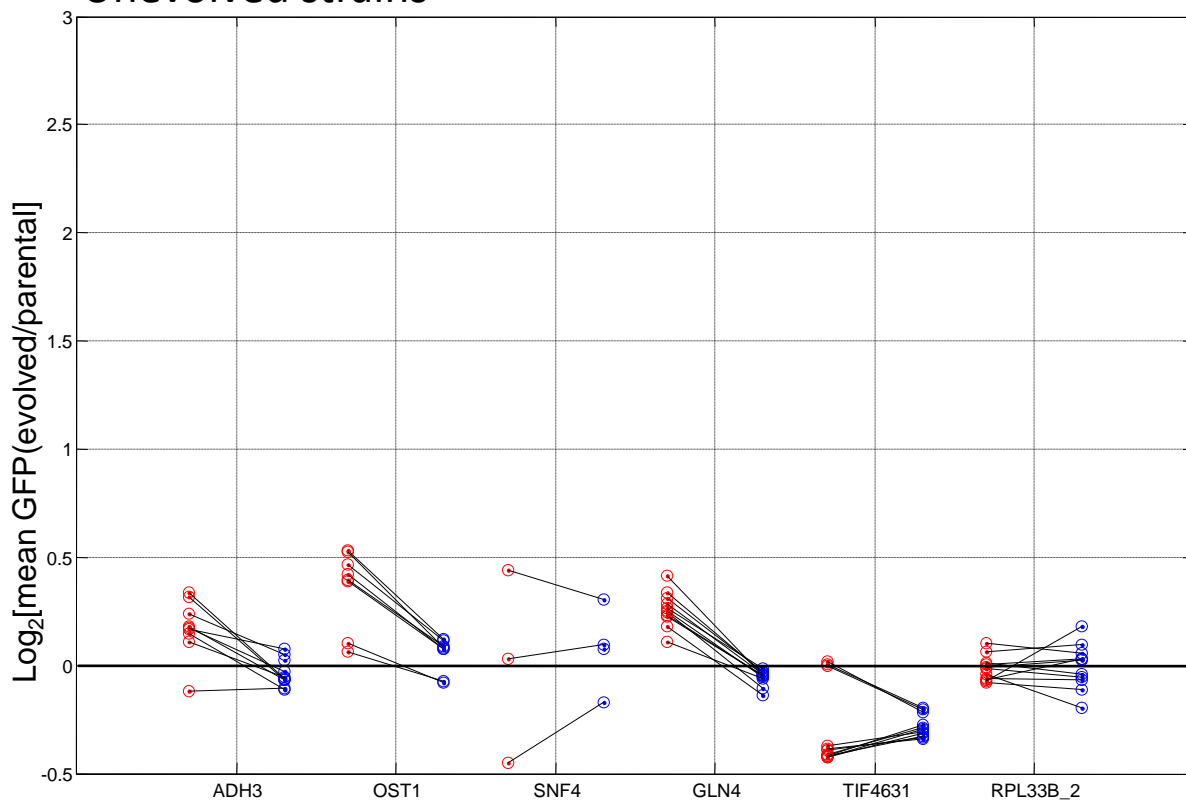

○ Haploids

○ Diploids
