# Supplementary material for: Promoter Nucleosome Organization Shapes the Evolution of Gene Expression
Source: PubMed Central journal article supplement (PMC3305400; doi:10.1371/journal.pgen.1002579), 2012-03-15

Fig. S5

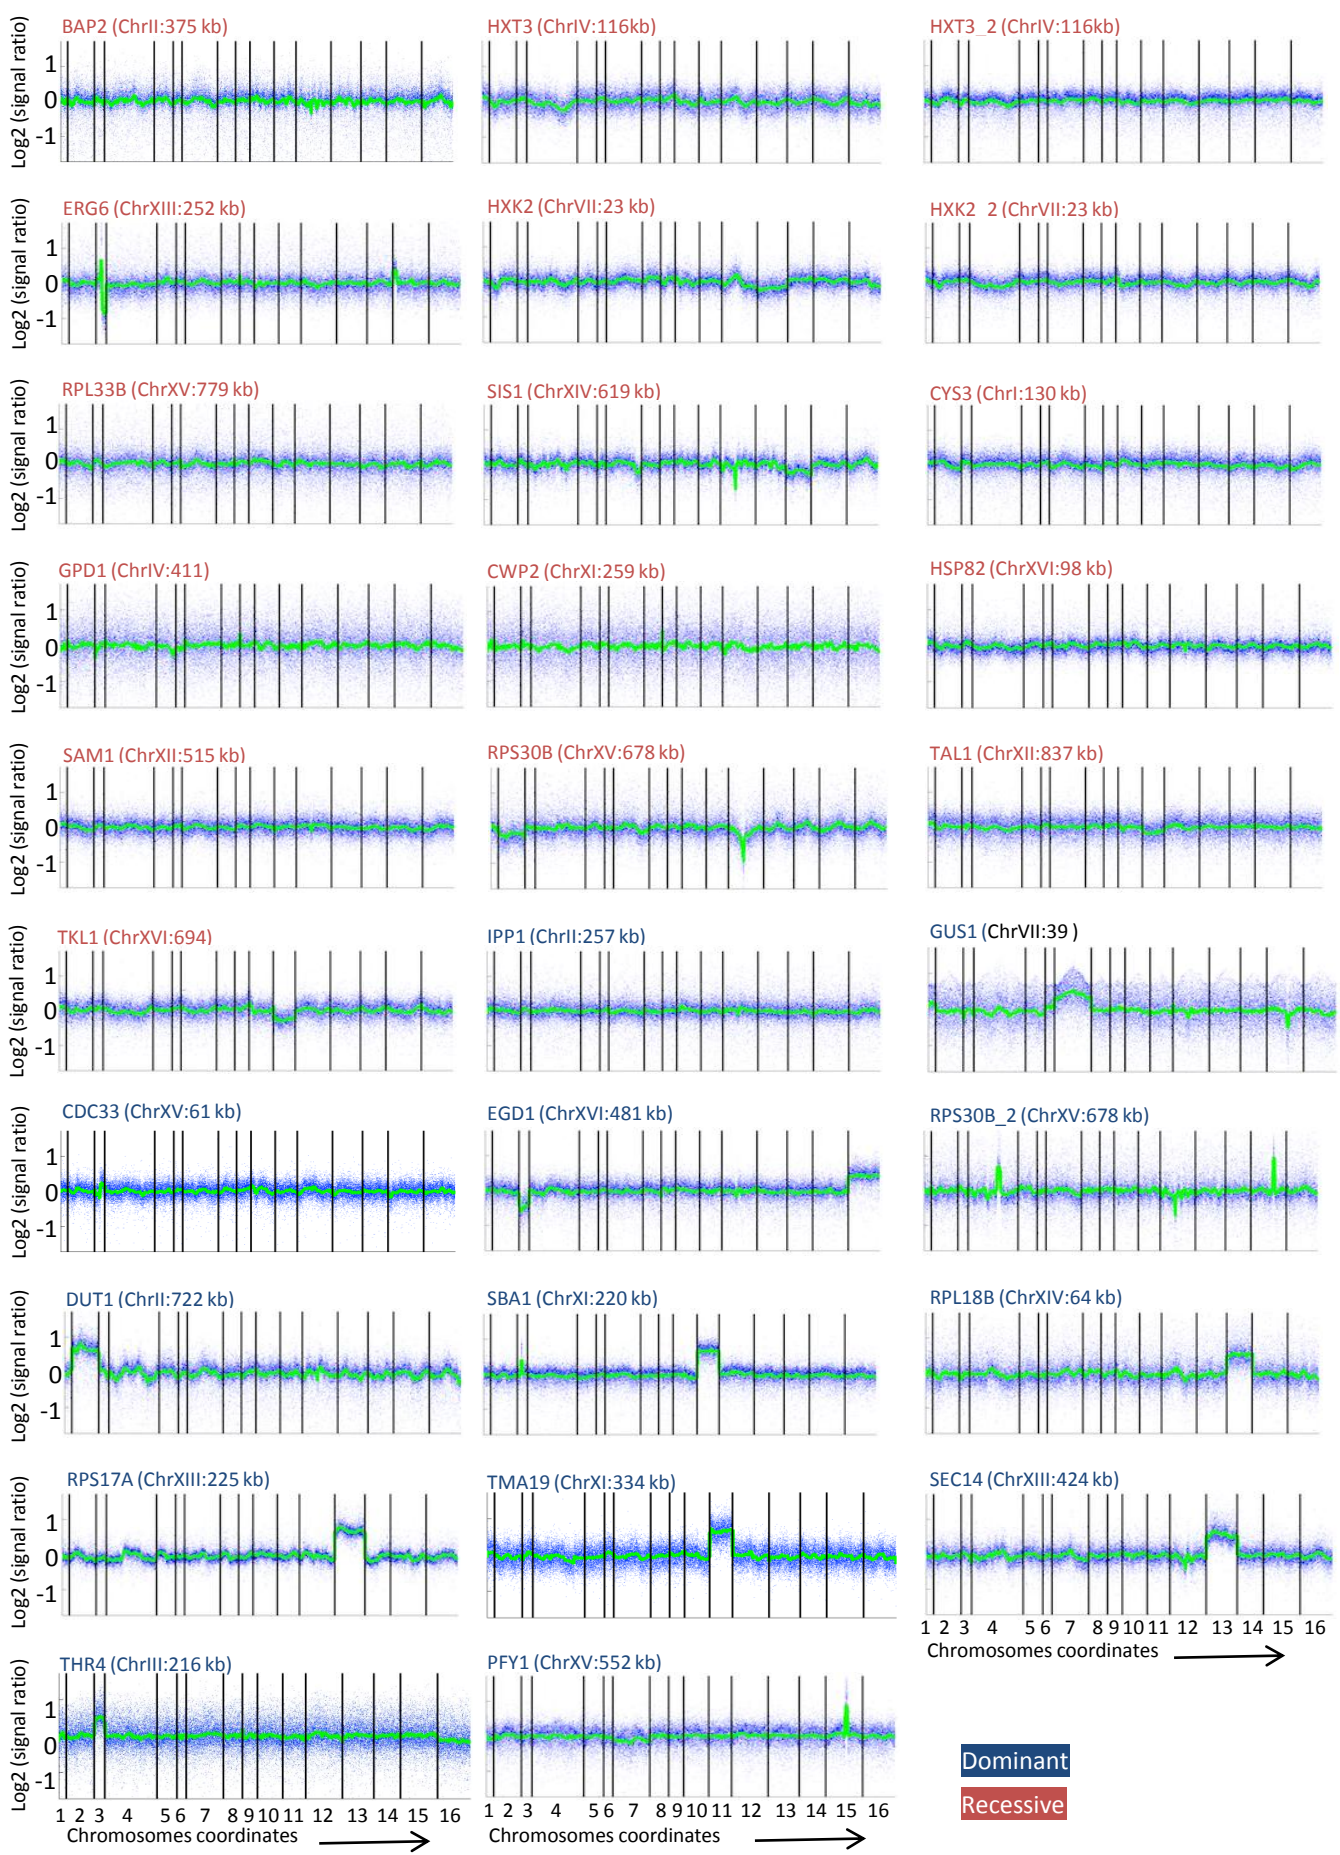

Supplement: pgen.1002579.s005.pdf [file pgen.1002579.s005.pdf]
