# Supplementary material for: Promoter Nucleosome Organization Shapes the Evolution of Gene Expression
Source: PLoS Genet. 2012 Mar 15;8(3):e1002579. doi: 10.1371/journal.pgen.1002579 (PMC3305400; doi:10.1371/journal.pgen.1002579)
Supplement: Table S1 — Genes used in our study and their classifications. (PDF) [file pgen.1002579.s008.pdf]

| Name    | systematic name | Av.Nuc.Occ ratio <sup>a</sup> | Initial expression | Initial noise (n) <sup>b</sup> | Distance from telomere | TATA <sup>c</sup> | Repeats <sup>c</sup> | Mode of Evolution (1st | Mode of Evolution (2 nd round) | Duplication             | reversion | comments                                     | Gene description                                                                                               |
|---------|-----------------|-------------------------------|--------------------|--------------------------------|------------------------|-------------------|----------------------|------------------------|--------------------------------|-------------------------|-----------|----------------------------------------------|----------------------------------------------------------------------------------------------------------------|
| CDC33   | YOL139C         | -1.55±0.6                     | 1700               | 0.12                           | 60.38 Kb               | -1                |                      | Dominant               |                                | no                      | no        | diploids (also original strain)              | Cytoplasmic mRNA cap binding protein and translation initiation factor eIF4E                                   |
| PFY1    | YOR122C         | -1.53±0.3                     | 500                | 0.16                           | 538.40 Kb              | 0                 |                      | Dominant               | Dominant                       | yes                     | no        |                                              | Profilin, binds actin, phosphatidylinositol 4,5-bisphosphate, and polyproline regions                          |
| CDC60   | YPL160W         | -1.42±0.3                     | 1200               | 0.16                           | 246.99 Kb              | 0                 |                      | Two modes              | Two modes                      | Yes (dominant colonies) |           |                                              | Cytosolic leucyl tRNA synthetase                                                                               |
| THR4    | YCR053W         | -1.18±0.3                     | 1400               | 0.13                           | 98.38 Kb               | 0                 |                      | Dominant               | Dominant                       | yes                     | yes       |                                              | Threonine synthase                                                                                             |
| RPL18B  | YNL301C         | -1.17±0.3                     | 1000               | 0.19                           | 63.57 Kb               | -1                |                      | Dominant               |                                | yes                     |           |                                              | Protein component of the large (60S) ribosomal subunit                                                         |
| DUT1    | YBR252W         | -1.07±0.2                     | 100                | 0.39                           | 90.13 Kb               | 0                 |                      | Dominant               | Dominant                       | yes                     | yes       |                                              | deoxyuridine triphosphate diphosphatase (dUTPase)                                                              |
| OST1    | YJL002C         | -1.00±0.2                     | 300                | 0.16                           | 311.10 Kb              | -1                |                      | Did not evolve         |                                |                         |           |                                              | Alpha subunit of the oligosaccharyltransferase complex of the ER lumen                                         |
| ERV25   | YML012W         | -0.98±0.1                     | 500                | 0.18                           | 246.12 Kb              | -1                |                      | Dominant               |                                | yes                     |           | mix of diploids and haploids after evolution | member of the p24 family involved in endoplasmic reticulum to Golgi transport                                  |
| GUS1    | YGL245W         | -0.97±0.6                     | 800                | 0.15                           | 39.02 Kb               | 0                 |                      | Dominant               | Two modes                      | yes                     | yes       |                                              | Glutamyl-tRNA synthetase                                                                                       |
| IPP1    | YBR011C         | -0.85±0.2                     | 500                | 0.23                           | 257.11 Kb              | -1                |                      | Dominant               |                                | no                      |           |                                              | Cytoplasmic inorganic pyrophosphatase (PPase)                                                                  |
| ADH3    | YER027C         | -0.6±0.5                      | 200                | 0.45                           | 208.98 Kb              | -1                |                      | Did not evolve         |                                |                         |           |                                              | Mitochondrial alcohol dehydrogenase isozyme III                                                                |
| CYS3    | YAL012W         | -0.56±0.4                     | 1000               | 0.15                           | 98.22 Kb               | -1                |                      | Recessive              | Recessive                      | no                      | no        |                                              | Cystathionine gamma-lyase                                                                                      |
| SBA1    | YKL117W         | -0.38±0.3                     | 700                | 0.17                           | 219.97 Kb              | -1                |                      | Dominant               |                                | yes                     | yes       |                                              | Co-chaperone that binds to and regulates Hsp90 family chaperones                                               |
| EGD1    | YPL037C         | -0.37±0.01                    | 1500               | 0.15                           | 466.16 Kb              | 0                 |                      | Dominant               | Dominant                       | yes                     | no        |                                              | Subunit beta1 of the nascent polypeptide-associated complex (NAC) involved in protein targeting                |
| RPS21A  | YKR057W         | -0.26±1.1                     | 1400               | 0.12                           | 114.57 Kb              | -1                |                      | Dominant               | Dominant                       | yes                     |           |                                              | Protein component of the small (40S) ribosomal subunit                                                         |
| GAL83   | YGL115W         | -0.26±0.4                     | 100                | 0.37                           | 292.04 Kb              | 1                 |                      | Did not evolve         |                                |                         |           |                                              | One of three possible beta-subunits of the Snf1 kinase complex                                                 |
| GLN4    | YOR168W         | -0.21±0.4                     | 900                | 0.18                           | 439.56 Kb              | 1                 |                      | Did not evolve         |                                |                         |           |                                              | Glutamine tRNA synthetase                                                                                      |
| SEC14   | YMR079W         | -0.1±1                        | 600                | 0.14                           | 424.99 Kb              | -1                |                      | Dominant               | Dominant                       | yes                     | yes       |                                              | Phosphatidylinositol/phosphatidylcholine transfer protein                                                      |
| TMA19   | YKL056C         | 0.01±0.4                      | 2000               | 0.15                           | 331.89 Kb              | 1                 | 1                    | Dominant               | Dominant                       | yes                     | yes       |                                              | Protein that associates with ribosomes                                                                         |
| HSP82   | YPL240C         | 0.08±0.5                      | 2600               | 0.28                           | 96.50 Kb               | -1                |                      | Recessive              | Recessive                      | no                      |           |                                              | Hsp90 chaperone                                                                                                |
| TAL1    | YLR354C         | 0.12±0.8                      | 600                | 0.19                           | 240.82 Kb              | 0                 | 1                    | Recessive              | Recessive                      | no                      | no        |                                              | Transaldolase, enzyme in the non-oxidative pentose phosphate pathway                                           |
| SNF4    | YMR083W         | 0.21±0.3                      | 100                | 0.23                           | 434.79 Kb              | -1                |                      | Did not evolve         |                                |                         |           |                                              | Activating gamma subunit of the AMP-activated Snf1p kinase complex                                             |
| NSR1    | YGR159C         | 0.23±0.4                      | 900                | 0.20                           | 283.29 Kb              | -1                |                      | Two modes              |                                | Yes (dominant colonies) |           |                                              | Nucleolar protein that binds nuclear localization sequences                                                    |
| HXK2    | YGL253W         | 0.31±0.5                      | 3100               | 0.18                           | 23.93 Kb               | -1                | 1                    | Recessive              | Recessive                      | no                      | no        |                                              | Hexokinase isoenzyme 2 that catalyzes phosphorylation of glucose in the cytosol                                |
| RHR2    | YIL053W         | 0.33±1.22                     | 2400               | 0.24                           | 184.02 Kb              | 0                 | 1                    | Two modes              | Dominant                       | Yes (dominant colonies) |           |                                              | Constitutively expressed isoform of DL-glycerol-3-phosphatase                                                  |
| TIF4631 | YGR162W         | 0.44±0.1                      | 1200               | 0.17                           | 264.02 Kb              | -1                |                      | Did not evolve         |                                |                         |           |                                              | Translation initiation factor eIF4G                                                                            |
| RTN1    | YDR233C         | 0.54±0.6                      | 1000               | 0.14                           | 601.57 Kb              | 0                 |                      | Dominant               | Dominant                       | yes                     | .         |                                              | ER membrane protein that interacts with Sey1p to maintain ER morphology                                        |
| CWP2    | YKL096W-A       | 0.65±1.11                     | 900                | 0.22                           | 258.90 Kb              | 0                 |                      | Recessive              |                                | no                      | no        |                                              | Covalently linked cell wall mannoprotein, major constituent of the cell wall                                   |
| HSC82   | YMR186W         | 0.67±0.6                      | 5600               | 0.22                           | 289.96 Kb              | 1                 |                      | Two modes              | Dominant                       | Yes (dominant colonies) |           |                                              | Cytoplasmic chaperone of the Hsp90 family                                                                      |
| TKL1    | YPR074C         | 0.68±0.6                      | 2500               | 0.17                           | 253.23 Kb              | 0                 |                      | Recessive              | Recessive                      | no                      | no        |                                              | Transketolase,enzyme in the non-oxidative pentose phosphate pathway                                            |
| SML1    | YML058W         | 0.73±0.3                      | 800                | 0.24                           | 159.38 Kb              | 1                 |                      | Dominant               |                                | yes                     |           |                                              | Ribonucleotide reductase inhibitor involved in regulating dNTP production                                      |
| RPS17A  | YML024W         | 0.78±0.6                      | 1700               | 0.14                           | 225.89 Kb              | -1                | 1                    | Dominant               | Dominant                       | yes                     |           |                                              | Ribosomal protein 51 (rp51) of the small (40s) subunit                                                         |
| RPS30B  | YOR182C         | 1.07±0                        | 1300               | 0.15                           | 412.50 Kb              |                   |                      | Recessive              | Dominant                       | no                      | no        |                                              | Protein component of the small (40S) ribosomal subunit                                                         |
| SAM1    | YLR180W         | 1.08±0.43                     | 2000               | 0.16                           | 515.26 Kb              | -1                |                      | Recessive              | Recessive                      | no                      |           |                                              | S-adenosylmethionine synthetase                                                                                |
| GPD1    | YDL022W         | 1.13±0.6                      | 700                | 0.30                           | 411.82 Kb              | 1                 |                      | Recessive              | Recessive                      | no                      |           |                                              | NAD-dependent glycerol-3-phosphate dehydrogenase                                                               |
| SIS1    | YNL007C         | 1.25±0.3                      | 600                | 0.19                           | 164.77 Kb              | 0                 |                      | Recessive              |                                | no                      |           |                                              | Type II HSP40 co-chaperone that interacts with the HSP70 protein Ssa1p                                         |
| BAP2    | YBR068C         | 1.50±1                        | 500                | 0.23                           | 373.86 Kb              | 0                 |                      | Recessive              | Recessive                      | no                      | no        |                                              | High-affinity leucine permease                                                                                 |
| RPL33B  | YOR234C         | 1.55±0                        | 1000               | 0.16                           | 311.88 Kb              |                   |                      | Recessive              | Did not evolve                 | no                      |           |                                              | Ribosomal protein L37 of the large (60S) ribosomal subunit                                                     |
| HXT3    | YDR345C         | 1.72±0.8                      | 1300               | 0.17                           | 367.26 Kb              | 1                 |                      | Recessive              | Recessive                      | no                      | no        |                                              | Low affinity glucose transporter                                                                               |
| PIL1    | YGR086C         | 1.77±0.3                      | 900                | 0.19                           | 440.33 Kb              | 1                 | 1                    | Two modes              | Two modes                      | Yes (dominant colonies) |           | diploids (after evolution)                   | Primary component of eisosomes, which are large immobile cell cortex structures associated with endocytosis    |
| ERG6    | YML008C         | 2.20±0                        | 400                | 0.25                           | 251.84 Kb              | -1                |                      | Recessive              | Recessive                      | no                      | no        |                                              | Delta(24)-sterol C-methyltransferase, converts zymosterol to fecosterol in the ergosterol biosynthetic pathway |

a. See materials and methods for calculation  
b. η=std (flourecence)/mean(flourecence)  
c. 1=exist, -1= does not exist, o=not assigned
